# Supplementary material for: Genomic Predictors for Recurrence Patterns of Hepatocellular Carcinoma: Model Derivation and Validation
Source: PLOS journal article supplement (doi:10.1371/journal.pmed.1001770), 2014-12-23
Supplement: S6 (10.1371/journal.pmed.1001770.s006) [file journal.pmed.1001770.s006]

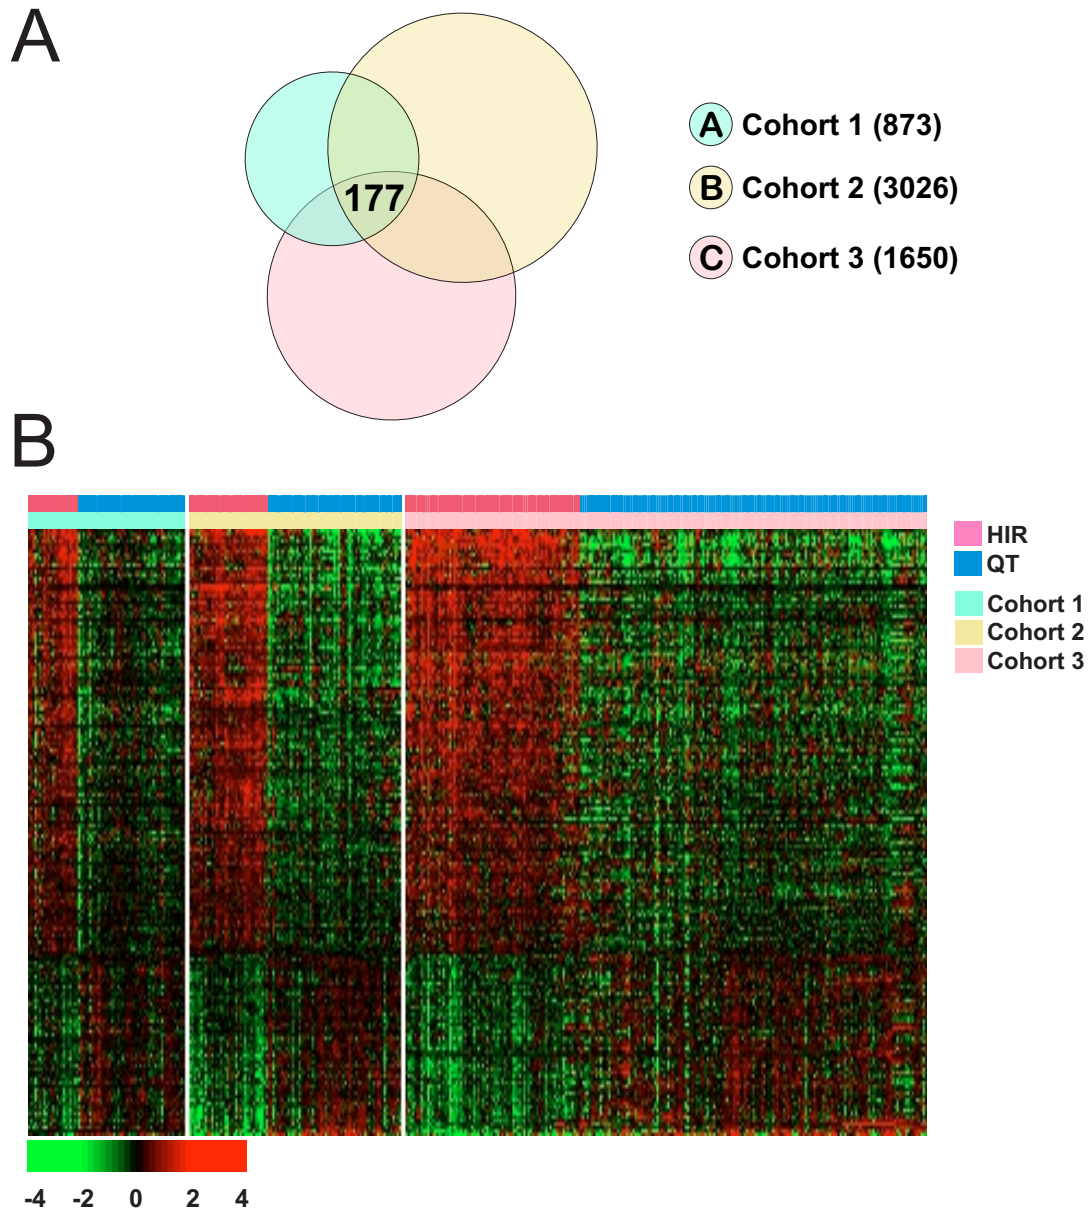

**Figure S5. Differentially Expressed Genes between HIR and QT subgroups of HCC in three cohorts**

(A) Venn Diagram of genes whose expression levels are significantly different between the HIR and QT subgroups of non-tumor surrounding tissues from patients with HCC (cohorts 1, 2, and 3). A P value of  $< 0.001$  was required for a gene to be retained.

(B) Expression patterns of the 177 up- or down-regulated in all three cohorts. Colored bars at the top of the heat map represent samples as indicated.
