# Supplementary material for: Genomic Predictors for Recurrence Patterns of Hepatocellular Carcinoma: Model Derivation and Validation
Source: PLOS journal article supplement (doi:10.1371/journal.pmed.1001770), 2014-12-23
Supplement: S9 (10.1371/journal.pmed.1001770.s009) [file journal.pmed.1001770.s009]

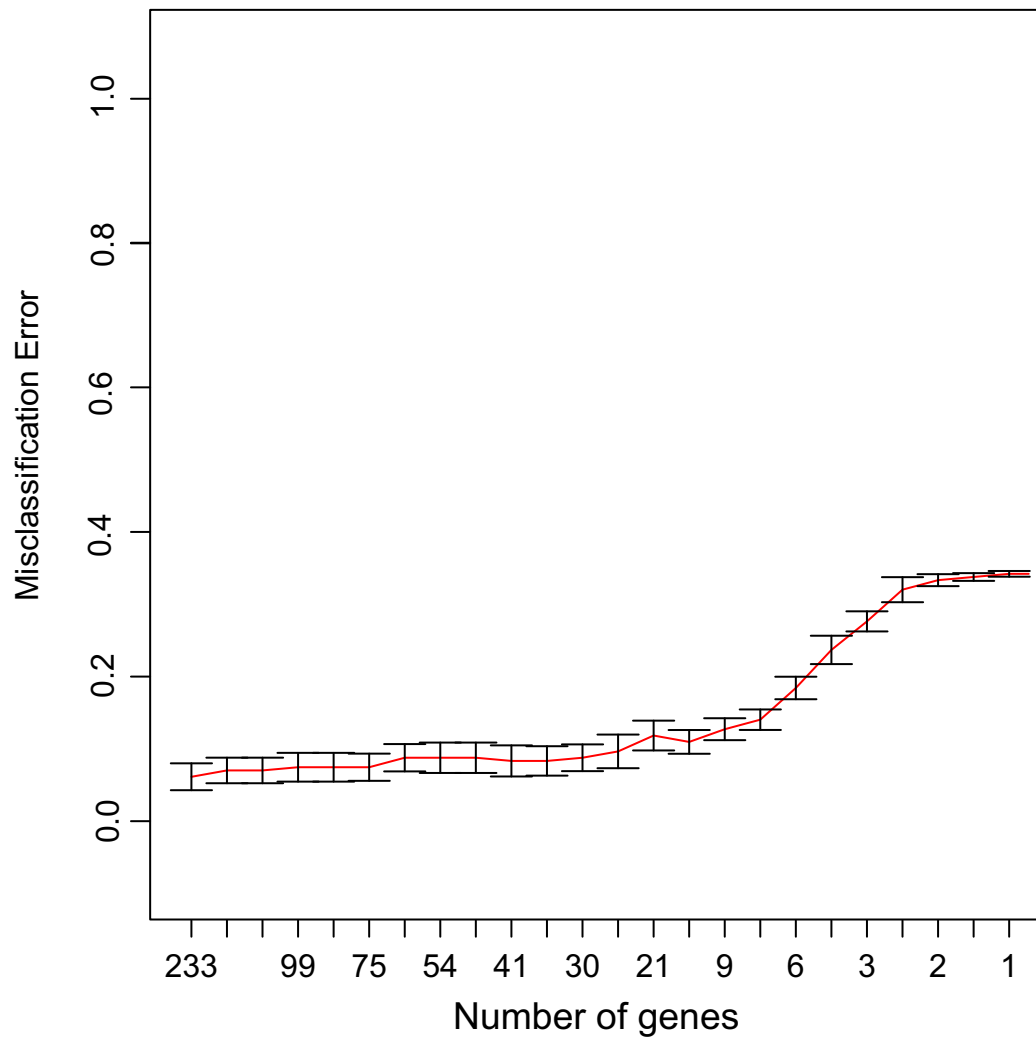

**Figure S8. Miscalculation rate of prediction models with given number of genes.**

Gene expression data from cohort 3 were used for estimation of minimum number of genes for prediction model. Prediction models with 10 to 20 genes showed acceptable rate of miscalculation (10%).
