# Supplementary material for: Genomic Predictors for Recurrence Patterns of Hepatocellular Carcinoma: Model Derivation and Validation
Source: PLOS journal article supplement (doi:10.1371/journal.pmed.1001770), 2014-12-23
Supplement: S11 (10.1371/journal.pmed.1001770.s011) [file journal.pmed.1001770.s011]

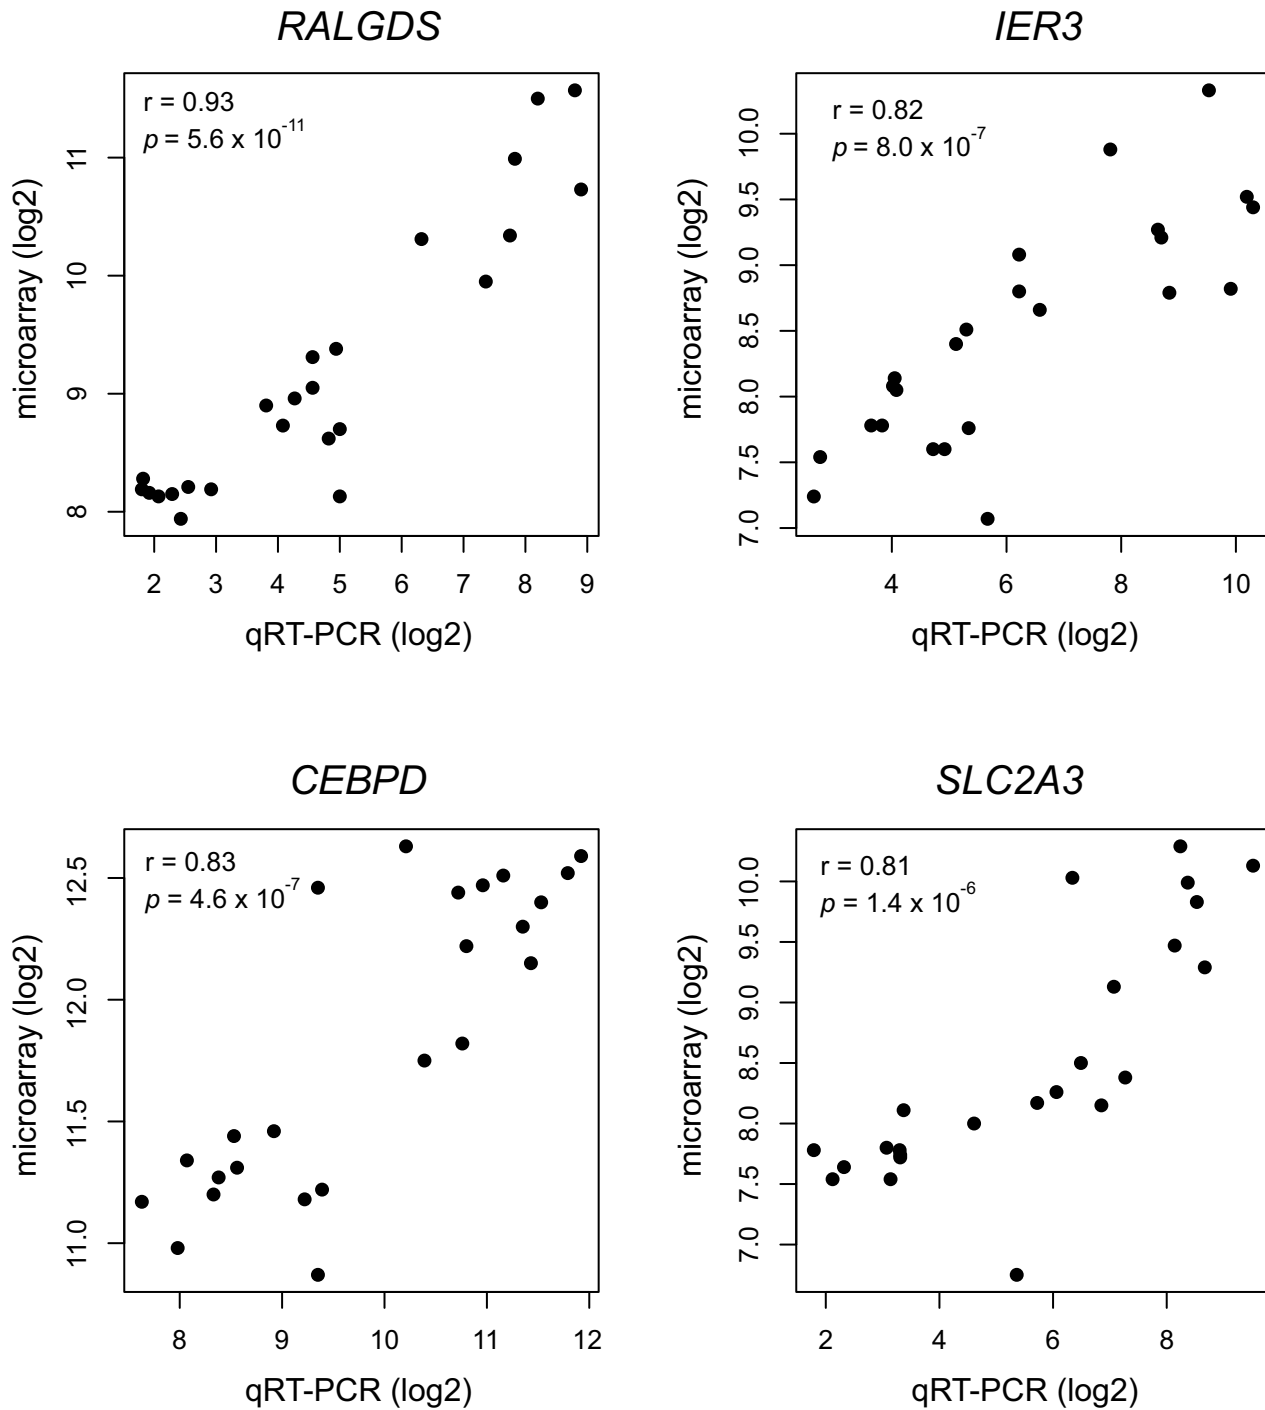

**Figure S10. Significance concordance between expression data from microarray experiments and qRT-PCR experiments in 4 genes selected from multivariate logistic regression analysis.**

Scatter plots of normalized gene expression data between two experiments from 24 surrounding tissues from HCC patients. Gene expression data from qRT-PCR experiments were normalized to the expression level of *GAPDH* in the sample.
